# Supplementary material for: A versatile approach to different colored photonic films generated from block copolymers and their conversion into polymer-grafted nanoplatelets
Source: Royal Society of Chemistry journal article supplement (doi:10.1039/c7tc02562a), 2017-01-01
Supplement: c7tc02562a1.pdf [file c7tc02562a1.pdf]

## Supporting information

### **A Versatile Approach to Different Colored Photonic Films Generated from Block Copolymers and Their Conversion into Polymer-Grafted Nanoplatelets**

Yucheng Huang, Yang Zheng, Julia Pribyl, and Brian C. Benicewicz\*

Department of Chemistry and Biochemistry, University of South Carolina, Columbia, SC 29208,  
United States

\*E-mail: [benice@sc.edu](mailto:benice@sc.edu)

## Content

**Fig. S1**  $^1\text{H}$  NMR ( $\text{CDCl}_3$ , 300MHz) of PTEPM<sub>666</sub> polymer solution

**Fig. S2**  $^1\text{H}$  NMR ( $\text{CDCl}_3$ , 300MHz) of PTEPM<sub>666</sub>-*b*-PTEPM<sub>553</sub> block copolymer

**Fig. S3** GPC curves of PTEPM<sub>666</sub> and PTEPM<sub>666</sub>-*b*-PSMA<sub>553</sub>

**Fig. S4** FT-IR spectra of PTEPM<sub>666</sub>-*b*-PSMA<sub>553</sub> and PSMA<sub>553</sub>-*g*-SiO<sub>2</sub>

**Fig. S5** TGA of PSMA<sub>553</sub>-*g*-SiO<sub>2</sub>

**Fig. S6** Transmission spectra of films immersed in solvents with different time. (a) PTEPM<sub>390</sub>-*b*-PSMA<sub>553</sub> film in EtOH; (b) PSMA<sub>353</sub>-*g*-SiO<sub>2</sub> film in THF

**Fig. S7** ESAXS of PSMA<sub>553</sub>-*g*-SiO<sub>2</sub> dry film and film in ethanol.

**Fig. S8** ESAXS of PSMA<sub>750</sub>-*b*-PSMA<sub>473</sub> film formed by rapid THF evaporation before and after thermal annealing.

**Fig. S9** DSC PTEPM<sub>666</sub>-*b*-PSMA<sub>553</sub> and PSMA<sub>553</sub>-*g*-SiO<sub>2</sub>

**Fig. S10**  $^1\text{H}$  NMR ( $\text{CDCl}_3$ , 400MHz) of PTEPM<sub>390</sub> polymer solution

**Fig. S11**  $^1\text{H}$  NMR ( $\text{CDCl}_3$ , 400MHz) of PTEPM<sub>390</sub>-*b*-PTEPM<sub>353</sub> block copolymer

**Fig. S12** GPC curves of PTEPM<sub>390</sub> and PTEPM<sub>390</sub>-*b*-PSMA<sub>353</sub>

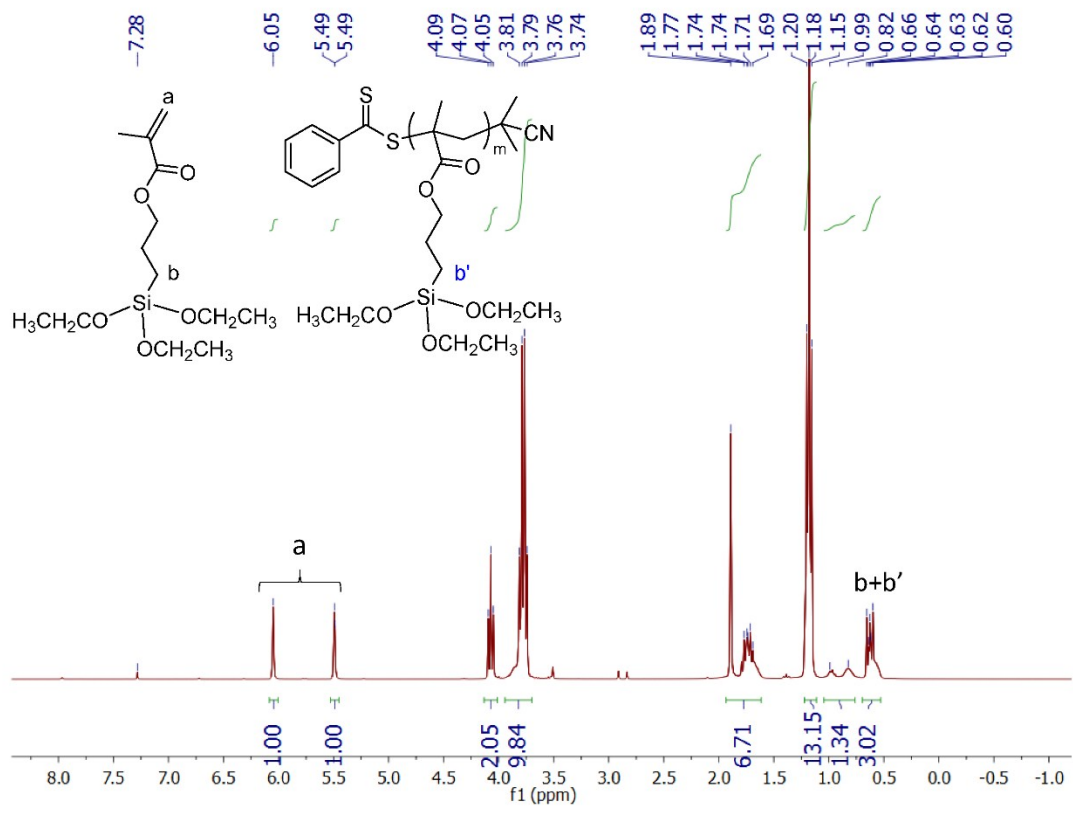

**Fig. S1**  $^1\text{H}$  NMR ( $\text{CDCl}_3$ , 300MHz) of PTEPM<sub>666</sub> polymer solution

The monomer conversion  $p$  was calculated by:

$$p = \frac{I(b + b') - I(a)}{I(b + b')}, \text{ I is the integration of peak}$$

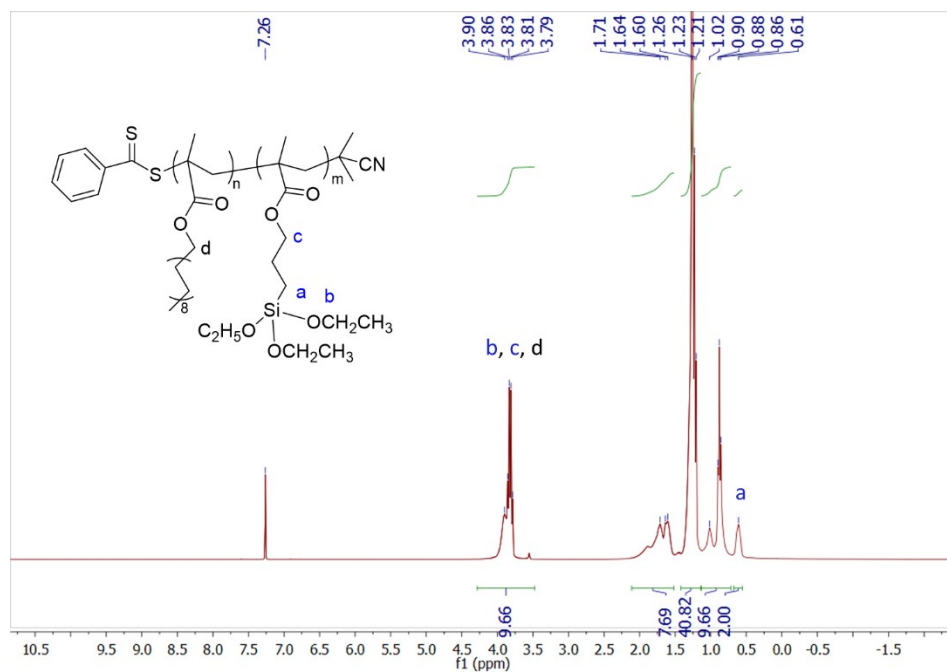

**Fig. S2**  $^1\text{H}$  NMR ( $\text{CDCl}_3$ , 300M) of  $\text{PTEPM}_{666}\text{-}b\text{-PTEPM}_{553}$  block copolymer

The ratio of degree of polymerization (DP) of TEPM ( $m$ ) and DP of SMA ( $n$ ) can be calculated by:

$$\frac{m}{n} = \frac{I(a)}{I(b,c,d) - 4I(a)}, \text{ I is the integration of peak}$$

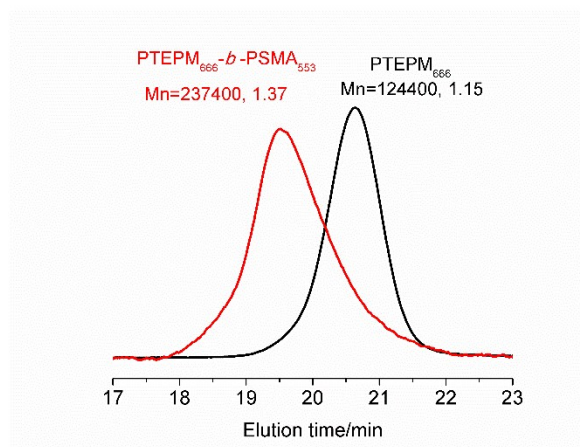

**Fig. S3** GPC curves of  $\text{PTEPM}_{666}$  and  $\text{PTEPM}_{666}\text{-}b\text{-PSMA}_{553}$

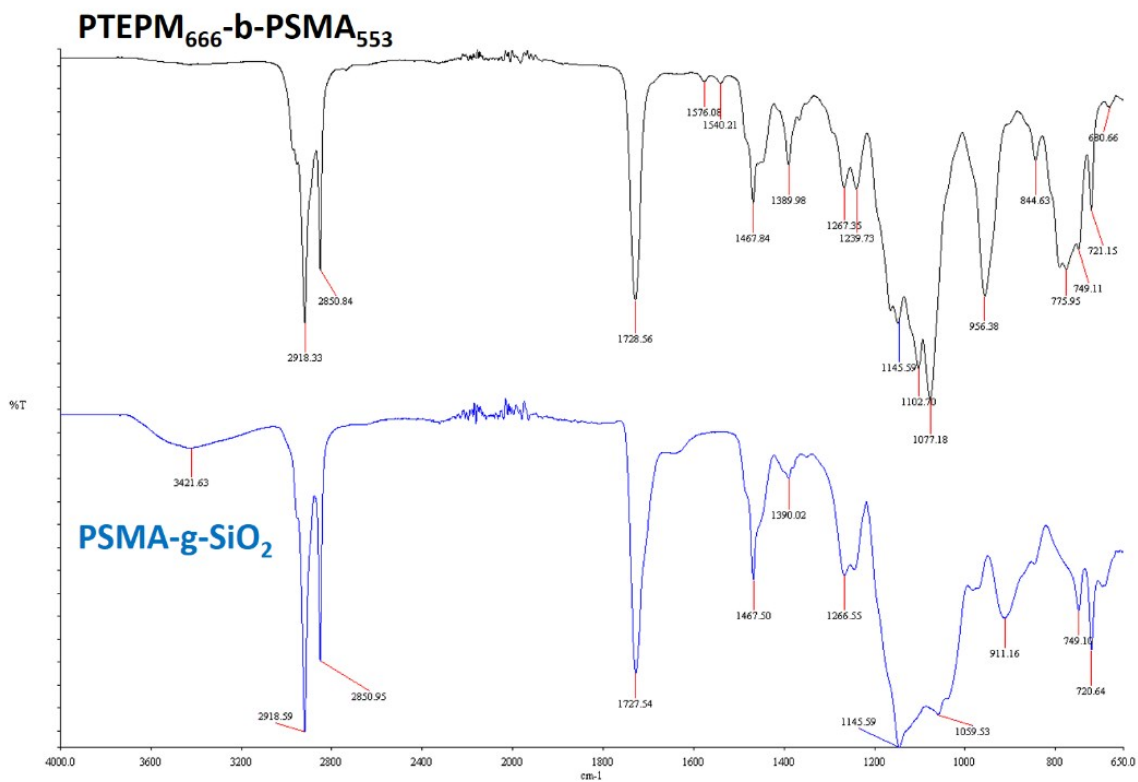

**Fig. S4** FT-IR spectra of PTEPM<sub>666</sub>-b-PSMA<sub>553</sub> and PSMA<sub>553</sub>-g-SiO<sub>2</sub>

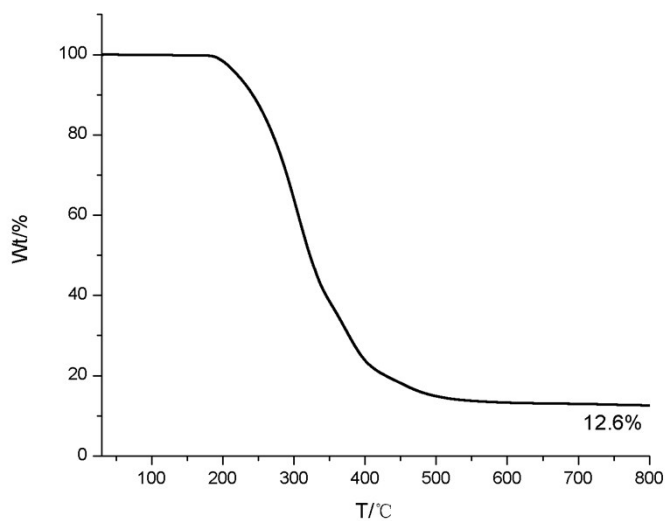

**Fig. S5** TGA of PSMA<sub>553</sub>-g-SiO<sub>2</sub>

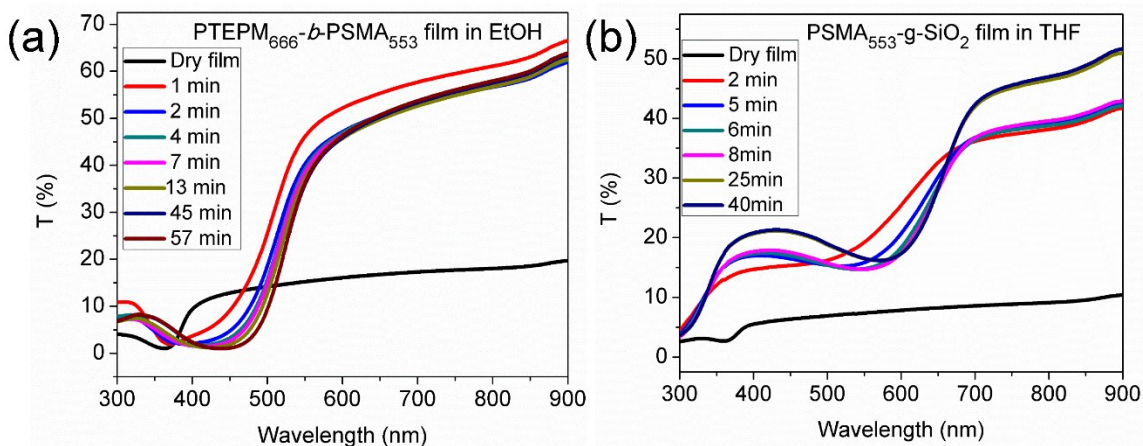

**Fig. S6** Transmission spectra of films immersed in solvents with different time. (a) PTEPM<sub>390</sub>-*b*-PSMA<sub>553</sub> film in EtOH; (b) PSMA<sub>353</sub>-*g*-SiO<sub>2</sub> film in THF.

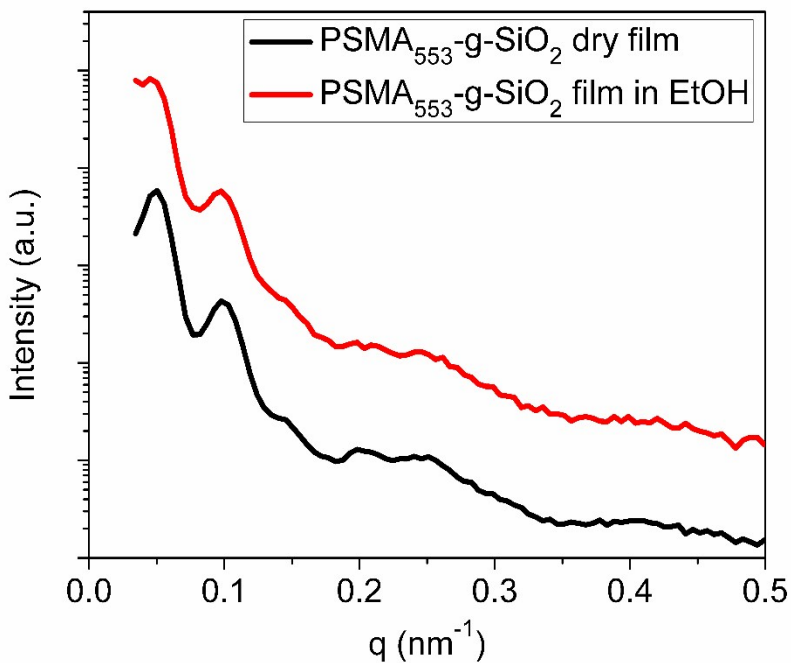

**Fig. S7** ESAXS of PSMA<sub>553</sub>-*g*-SiO<sub>2</sub> dry film and film in ethanol.

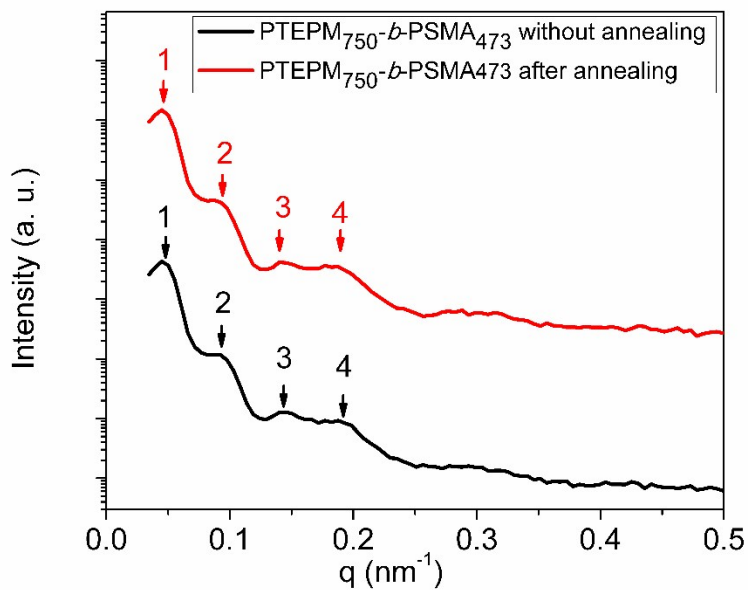

**Fig. S8** ESAXS of PSMA<sub>750</sub>-*b*-PSMA<sub>473</sub> film formed by rapid THF evaporation before and after thermal annealing.

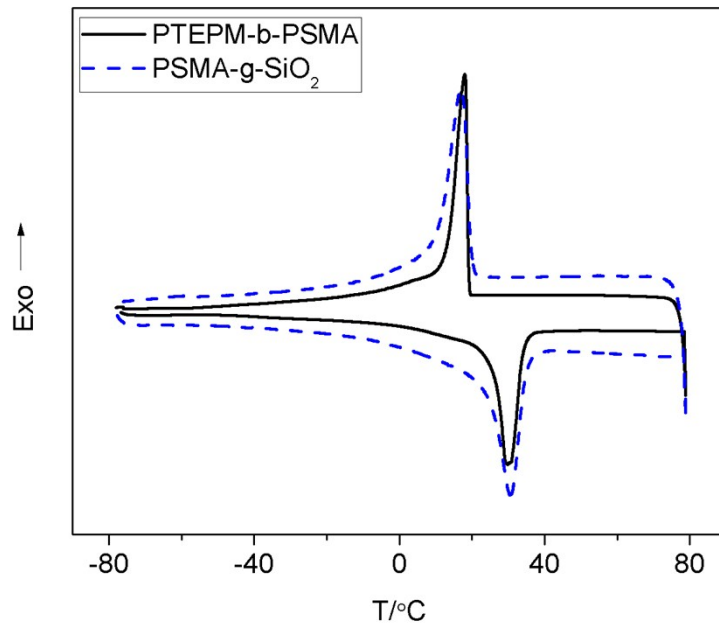

**Fig. S9** DSC PTEPM<sub>666</sub>-*b*-PSMA<sub>553</sub> and PSMA<sub>553</sub>-*g*-SiO<sub>2</sub>

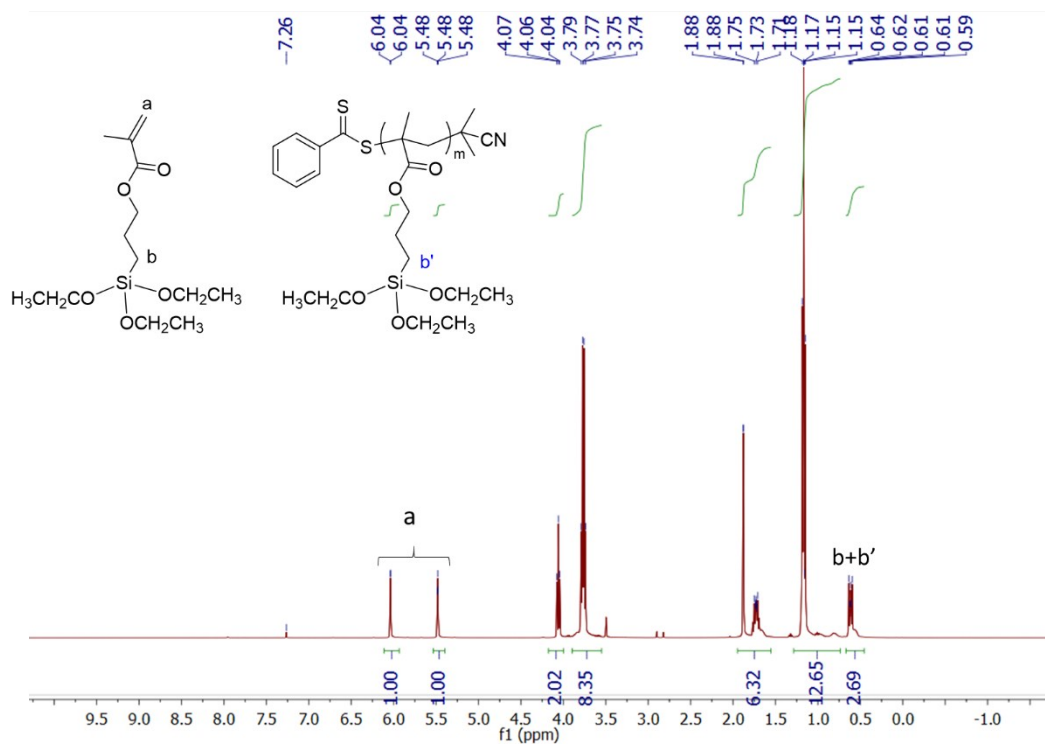

**Fig. S10** <sup>1</sup>H NMR (CDCl<sub>3</sub>, 400MHz) of PTEPM<sub>390</sub> polymer solution



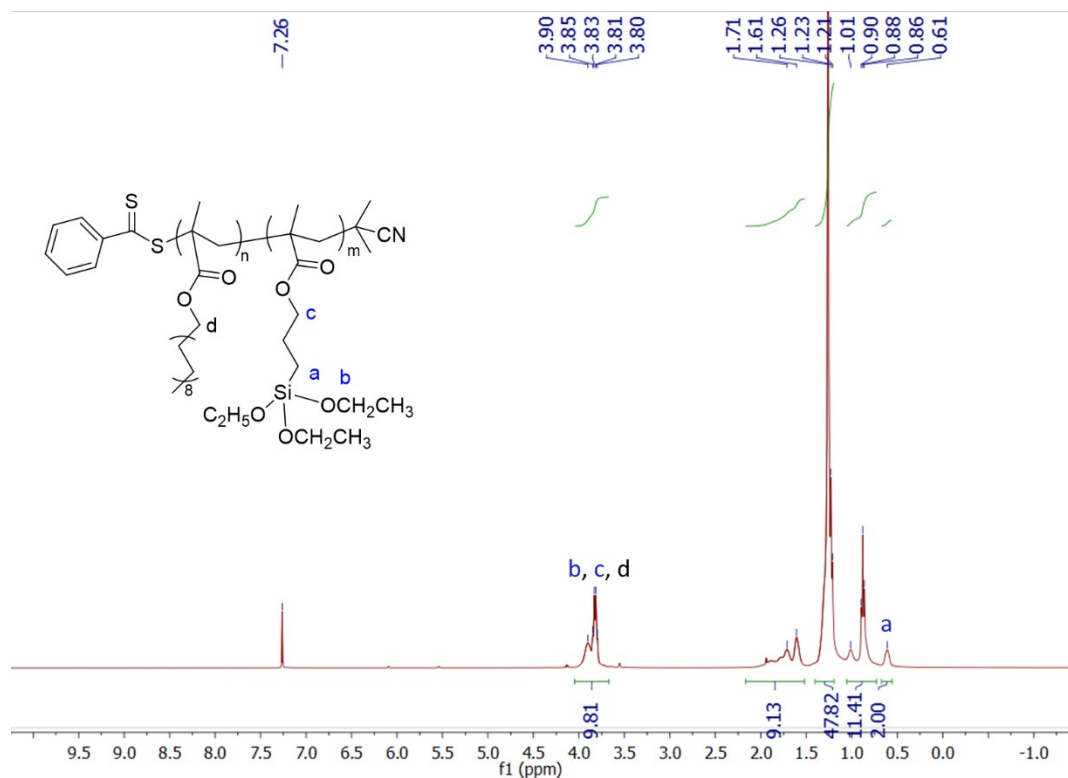

**Fig. S11** <sup>1</sup>H NMR (CDCl<sub>3</sub>, 400MHz) of PTEPM<sub>390</sub>-*b*-PTEPM<sub>353</sub> block copolymer

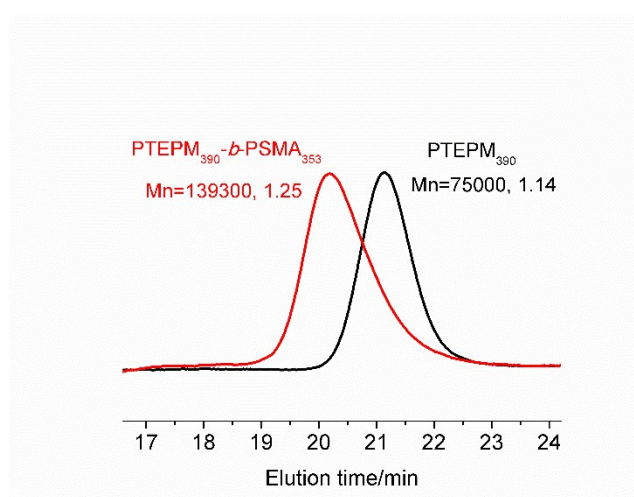

**Fig. S12** GPC curves of PTEPM<sub>390</sub> and PTEPM<sub>390</sub>-*b*-PSMA<sub>353</sub>
